# Supplementary material for: A New Vision on the Prosumers Energy Surplus Trading Considering Smart Peer-to-Peer Contracts
Source: Preprints.org preprint supplement (doi:10.20944/preprints202001.0013.v1), 2020-01-02
Supplement: Supplementary file 1 [file Load curve 28 bus network.xlsx]

## Sheet: Sheet1
P[kW]	C2	C3	C4	C5	C6	C7	C8	C9	C10	C11	C12	C13	C14	C15	C16	C17	C18	C19	C20	C21	C22	C23	C24	C25	C26	C27	C28
h1	0.616	2.01	0.273	0	1.37	2.41789	1.152	1.936	0.31	0.23	0.585	0.142	0.91	2.7832	2.22	0.21	0.36	0.3445	1.01	0.973333	0.636	0.79	0.049	1.266	0.384	0.248	0.006
h2	0.6083	1.908	0.078	0.02	1.52	2.20997	1.664	1.368	0.6775	0.22	0.765	0.078	0.92	2.4108	1.32	0	0.525	0.28575	1.1	1.01333	0.484	0.78	0.056	1.194	0.384	0.296	0
h3	0.5565	2.004	0.048	0.26	1.91	2.14858	2.056	1.376	0.3	0.2	0.585	0.352	0.925	2.548	0.942	0	0.534	0.2425	0.99	0.733333	0.448	0.73	0.749	1.056	0.388	0.26	0
h4	0.5222	2.01	0.306	0.04	1.77	2.15056	2.048	2.048	0.64	0.2	0.675	0.44	1.225	2.3128	0.972	0.045	0.636	0.2125	1.09	0.453333	0.46	0.92	1.148	1.032	0.392	0.292	0
h5	0.5222	1.902	0.063	0.05	1.99	2.19215	1.816	1.528	0.36	0.2	0.66	0.062	1.345	2.2883	0.954	0	0.444	0.23725	1.07	0.68	0.52	0.8	1.148	1.014	0.4	0.208	0
h6	0.5705	2.004	0.165	0.25	2.07	2.29908	1.168	2.992	0.4675	1.24	0.57	1.416	1.29	2.4255	1.044	0.115	0.462	0.2415	1.45	0.773333	0.512	1.34	1.148	1.02	0.396	0.356	0.048
h7	0.5292	1.836	0.213	0.125	2.28	2.36443	0.72	3.352	0.7475	1.4	0.9	0.482	1.325	3.2389	1.374	0.075	0.477	0.28075	2.26	0.98	0.428	0.96	1.946	1.122	0.376	0.7	0.035
h8	0.5922	1.236	0.06	4.71	2.53	2.54265	1.704	2.24	3.2075	1.44	0.63	0.182	1.52	3.7975	3.984	0.475	0.45	0.28675	0.61	1.56	0.368	0.27	1.393	1.116	0.352	0.336	0.038
h9	0.562	1.302	0.312	1.29	1.85	2.38225	1.976	2.112	2.815	1.17	0.765	0.502	1.43	3.0968	2.184	0.38	0.504	0.278	0.31	1.58	0.408	0.42	1.596	1.11	0.356	0.144	0
h10	0.616	1.2	0.258	0.525	1.85	2.54859	1.944	2.192	1.4825	1.13	0.645	1.046	1.12	4.3708	1.986	0.495	0.579	0.26825	0.4	1.34667	0.408	1	2.975	1.11	0.36	0.128	0.001
h11	0.8603	1.188	0.243	2.985	1.46	2.42582	1.904	2.232	4.5375	1.39	0.555	0.15	1.17	2.9939	1.986	1.13	0.573	0.285	0.31	1.71333	0.668	0.93	1.519	1.242	0.62	0.204	0.019
h12	0.5348	1.146	0.423	1.895	1.18	2.41393	1.872	2.144	3.295	1.74	0.63	1.032	1.265	3.7632	2.844	0.63	0.498	0.31475	0.5	1.91333	0.412	1.05	2.492	1.26	0.344	0.32	0.127
h13	0.6412	1.14	0.198	4.595	1.65	2.44958	2.456	2.048	3.65	1.76	0.615	0.056	1.76	2.9988	1.566	0.42	0.6	0.3005	0.76	3.12667	0.344	1.02	1.974	1.266	0.324	0.476	0.014
h14	0.322	1.374	0.378	0.93	1.95	2.41789	2.632	2.176	5.23	1.2	0.57	0.056	2	2.7587	0.93	0.98	0.54	0.3285	0.63	2.56	0.428	0.97	1.974	1.26	0.332	0.384	0.005
h15	0.1806	1.944	0.321	0.26	1.81	2.44364	1.896	2.256	4.2925	0.28	0.75	0.236	1.84	3.8073	0.798	0.955	0.357	0.31225	1.26	1.43333	1.068	1.01	2.24	1.206	0.94	0.456	0.061
h16	0.2142	1.542	0.207	0.535	2.64	2.4674	2.072	2.328	3.895	0.46	0.555	1.024	1.815	3.3173	1.152	0.965	0.423	0.3495	1.17	2.01333	0.424	1.11	2.296	1.134	2.5	0.352	0.022
h17	0.7812	2.148	0.495	2.125	2.81	2.55255	2.08	2.288	3.0275	3.18	0.825	0.232	2.015	3.2144	1.944	0.97	0.588	0.366	1.62	4	0.448	1.54	1.778	1.14	2.544	2	0.02
h18	0.7637	1.902	0.282	1.025	2.72	2.75652	2.016	2.336	1.98	2.57	0.78	0.89	2.365	2.94	2.046	0.96	0.57	0.46825	1.62	1.06667	0.468	1.63	1.939	1.26	2.82	0.876	0.057
h19	0.426	1.968	0.336	0.14	3.58	3.04168	2.72	2.464	1.7675	2.89	0.78	0.458	2.48	3.4447	2.46	1.45	0.678	0.44275	1.62	1.90667	0.436	1.57	1.75	1.296	2.104	1.824	0
h20	0.426	1.968	0.336	0.14	3.58	3.04168	2.72	2.464	1.7675	2.89	0.78	0.458	2.48	3.4447	2.46	1.45	0.678	0.44275	1.62	1.90667	0.436	1.57	1.75	1.296	2.104	1.824	0
h21	0.496	1.956	0.207	0.21	5.31	3.51496	2.672	3.136	3.0325	3.21	0.63	0.864	2.58	3.2781	1.884	1.385	0.753	0.45425	2.44	2.47333	1.092	1.28	1.106	1.212	2.144	0.728	0.102
h22	0.561	1.986	0.405	0.48	5.39	3.24762	2.488	1.312	5.695	3.26	0.57	1.326	2.365	2.4745	1.374	1.66	0.621	0.48225	2.57	2.25333	1.484	1.11	1.092	1.194	2.084	0.688	0.103
h23	0.5544	1.872	0.246	0.195	4.75	3.07534	2.432	1.336	4.0325	2.815	0.72	0.376	2.06	2.0727	1.38	1.235	0.75	0.50875	1.45	1.93333	1.364	0.71	1.092	1.194	2.248	0.256	0.133
h24	0.5782	1.986	0.045	0.1	3.17	2.71295	2.088	1.184	1.18	1.78	0.57	0.2	1.495	2.7685	1.158	0.88	0.39	0.32825	1.01	1.26	0.88	0.84	0.763	1.176	2.008	0.324	0.036
