# Supplementary material for: A New Vision on the Prosumers Energy Surplus Trading Considering Smart Peer-to-Peer Contracts
Source: Preprints.org preprint supplement (doi:10.20944/preprints202001.0013.v1), 2020-01-02
Supplement: Supplementary file 2 [file Load generation of prosumers.xlsx]

## Sheet: Sheet1
P[kW]	P6	P7	P15	P21	P27
h1	0	0	0	0	0
h2	0	0	0	0	0
h3	0	0	0	0	0
h4	0	0	0	0	0
h5	0	0	0	0	0
h6	2.07	2.299	4.3745	2.36067	0.356
h7	2.28	2.62657	4.8241	2.785	0.7
h8	2.53	3.24735	5.3845	3.286	1.004
h9	2.59175	3.43775	5.3252	3.329	1.581
h10	2.96625	3.64241	5.6732	3.63933	1.735
h11	3.346	3.82618	5.7691	3.75067	1.859
h12	3.50875	3.63907	5.6428	3.73467	1.915
h13	3.9445	3.86342	5.8252	3.81233	1.984
h14	3.297	3.80311	5.7043	3.742	1.756
h15	2.99425	3.49236	5.3527	3.46067	1.562
h16	2.64	2.8766	4.6417	2.83167	0.915
h17	2.81	2.553	4.2756	4	2
h18	2.72	2.757	4.101	2.23733	0.876
h19	0	0	0	0	0
h20	0	0	0	0	0
h21	0	0	0	0	0
h22	0	0	0	0	0
h23	0	0	0	0	0
h24	0	0	0	0	0
